# Supplementary material
Source: PubMed Central journal article supplement (PMC7097998)
Supplement: ao9b04302_si_001.pdf [file ao9b04302_si_001.pdf]

Electronic Supporting Material on the publication entitled

***In silico* rational design and virtual screening of  
bioactive peptides based on QSAR modeling**

**Mehri Mahmoodi-Reihani <sup>a</sup>, Fatemeh Abbasitabar <sup>b,\*</sup>, Vahid Zare-Shahabadi <sup>a</sup>**

<sup>a</sup> Department of Chemistry, Mahshahr Branch, Islamic Azad University, Mahshahr, Iran

<sup>b</sup> Department of Chemistry, Marvdasht Branch, Islamic Azad University, Marvdasht, Iran

## Table of Contents

|                                                                                                                                                         |   |
|---------------------------------------------------------------------------------------------------------------------------------------------------------|---|
| <b>Table S1.</b> AA indices used in the construction of the ACE QSAR model.....                                                                         | 3 |
| <b>Table S2.</b> Calculated numerical descriptive matrix (NDM) for ACE data set together with the experimental and predicted biological activities..... | 4 |
| <b>Table S3.</b> Physicochemical indices of amino acids used to calculate numerical descriptive vector for bitter peptide.....                          | 5 |
| <b>Table S4.</b> Calculated NDM for BBT data set together with the experimental and predicted biological activities.....                                | 6 |
| <b>Table S5.</b> Statistical analysis of the selected QSAR model for BTT data set.....                                                                  | 7 |
| <b>Table S6.</b> QSAR models for HLA data set obtained using different sets of the AA indices.....                                                      | 8 |

**Table S1.** AA indices used in the construction of the ACE QSAR model.

| <b>AA index</b>                                                                                    | <b>min</b> | <b>max</b> |
|----------------------------------------------------------------------------------------------------|------------|------------|
| Signal sequence helical potential (Argos et al., 1982)                                             | 0.05       | 3.23       |
| Short and medium range non-bonded energy per residue (Oobatake-Ooi, 1977)                          | -14.42     | -5.46      |
| Weights for coil at the window position of -4 (Qian-Sejnowski, 1988)                               | -0.43      | 0.33       |
| Weights for coil at the window position of 1 (Qian-Sejnowski, 1988)                                | -0.99      | 2.27       |
| Information measure for extended without H-bond (Robson-Suzuki, 1976)                              | -3.70      | 7.40       |
| Information measure for N-terminal turn (Robson-Suzuki, 1976)                                      | -4.30      | 6.50       |
| Alpha helix propensity of position 44 in T4 lysozyme (Blaber et al., 1993)                         | -2.50      | 0.96       |
| Hydrophobicity coefficient in RP-HPLC, C18 with 0.1% TFA/MeCN/H <sub>2</sub> O (Wilce et al. 1995) | -2.24      | 4.80       |

**Table S2.** Calculated numerical descriptive matrix (NDM) for ACE data set together with the experimental and predicted biological activities.

|          | Sequence | Numerical descriptive vector |         |         | Experimental | Predicted |
|----------|----------|------------------------------|---------|---------|--------------|-----------|
| Training | VVV      | -16.059                      | -17.474 | -16.059 | 1.63         | 1.951     |
| Training | RPG      | -15.869                      | -18.640 | -10.460 | 3.09         | 2.913     |
| Training | GRP      | -10.709                      | -16.374 | -18.336 | 0.48         | 1.191     |
| Training | LLL      | -19.907                      | -21.660 | -19.907 | 1.35         | 1.561     |
| Training | GLG      | -12.276                      | -18.156 | -12.276 | 2.45         | 2.354     |
| Training | LGL      | -18.060                      | -14.667 | -18.060 | 1.52         | 1.728     |
| Training | FGG      | -18.470                      | -12.909 | -10.830 | 2.79         | 3.002     |
| Training | GFG      | -12.157                      | -19.112 | -12.157 | 2.53         | 2.370     |
| Training | GGF      | -10.830                      | -12.909 | -18.470 | 1.11         | 1.162     |
| Training | FFG      | -20.986                      | -21.518 | -12.740 | 2.71         | 2.875     |
| Training | FGF      | -19.376                      | -14.717 | -19.376 | 1.29         | 1.589     |
| Training | GFF      | -12.740                      | -21.518 | -20.986 | 1.02         | 0.889     |
| Training | GGG      | -10.452                      | -11.373 | -10.452 | 2.61         | 2.520     |
| Training | GYG      | -11.467                      | -18.638 | -11.467 | 2.33         | 2.441     |
| Training | GGY      | -10.405                      | -12.211 | -18.099 | 1.35         | 1.195     |
| Training | YGY      | -19.194                      | -13.875 | -19.194 | 1.82         | 1.605     |
| Training | GYG      | -11.956                      | -21.384 | -21.008 | 1.07         | 0.832     |
| Training | YYY      | -21.965                      | -23.900 | -21.965 | 1.54         | 1.352     |
| Training | FIV      | -20.314                      | -18.730 | -16.134 | 2.04         | 2.231     |
| Training | FPP      | -20.214                      | -22.188 | -20.771 | 1.50         | 1.434     |
| Training | FPK      | -20.046                      | -20.149 | -15.551 | 2.45         | 2.319     |
| Training | PPF      | -20.270                      | -21.894 | -20.270 | 1.74         | 1.523     |
| Training | RRR      | -16.445                      | -17.894 | -16.445 | 1.77         | 1.912     |
| Training | PPP      | -21.211                      | -23.080 | -21.211 | 1.86         | 1.429     |
| Training | FFF      | -21.809                      | -23.731 | -21.809 | 1.20         | 1.368     |
| Training | RGP      | -14.714                      | -11.989 | -17.310 | 1.73         | 1.622     |
| Training | PGR      | -17.310                      | -11.989 | -14.714 | 2.67         | 2.247     |
| Training | GGV      | -10.390                      | -11.634 | -13.873 | 1.99         | 1.924     |
| Training | GVV      | -10.928                      | -16.035 | -15.508 | 1.82         | 1.694     |
| Training | PPG      | -20.098                      | -20.235 | -10.251 | 3.18         | 3.241     |
| Training | PGG      | -16.635                      | -10.795 | -9.652  | 3.14         | 3.074     |
| Training | PGP      | -18.073                      | -11.965 | -18.073 | 1.82         | 1.716     |
| Training | GPG      | -10.021                      | -17.042 | -10.021 | 2.65         | 2.588     |
| Training | GGP      | -9.652                       | -10.795 | -16.635 | 1.28         | 1.392     |
| Training | PGI      | -17.183                      | -11.993 | -14.779 | 2.23         | 2.227     |
| Training | KPK      | -15.462                      | -18.690 | -15.462 | 2.63         | 2.019     |
| Training | ADA      | -12.482                      | -15.568 | -12.482 | 2.17         | 2.322     |
| Training | GEG      | -11.098                      | -15.803 | -11.098 | 2.28         | 2.469     |
| Training | LEL      | -18.749                      | -18.799 | -18.749 | 1.19         | 1.672     |
| Training | RGP      | -14.714                      | -11.989 | -17.310 | 1.73         | 1.622     |
| Training | PIP      | -19.358                      | -17.903 | -19.358 | 1.69         | 1.604     |
| Training | FPF      | -20.665                      | -21.651 | -20.665 | 1.32         | 1.481     |
| Training | KPF      | -15.551                      | -20.149 | -20.046 | 1.51         | 1.237     |
| Training | VYP      | -16.493                      | -21.952 | -20.309 | 0.82         | 1.262     |
| Training | YPF      | -21.324                      | -22.213 | -20.575 | 1.60         | 1.543     |
| Test     | LGG      | -17.406                      | -13.060 | -11.014 | 2.49         | 2.899     |
| Test     | GGL      | -11.014                      | -13.060 | -17.406 | 1.63         | 1.359     |
| Test     | LLG      | -19.297                      | -19.979 | -12.822 | 2.33         | 2.741     |
| Test     | GLL      | -12.822                      | -19.979 | -19.297 | 1.47         | 1.181     |
| Test     | YGG      | -18.099                      | -12.211 | -10.405 | 3.07         | 3.048     |
| Test     | YYG      | -21.008                      | -21.384 | -11.956 | 2.79         | 3.012     |
| Test     | LDL      | -18.636                      | -18.192 | -18.636 | 1.42         | 1.681     |
| Test     | VIF      | -16.134                      | -18.730 | -20.314 | 0.78         | 1.224     |
| Test     | RPF      | -16.590                      | -20.826 | -20.176 | 1.59         | 1.287     |
| Test     | PPF      | -20.771                      | -22.188 | -20.214 | 1.68         | 1.568     |

**Table S3.** Physicochemical indices of amino acids used to calculate numerical descriptive vector for bitter peptide

| <b>AA index</b>                                                                                                | <b>Min</b> | <b>Max</b> |
|----------------------------------------------------------------------------------------------------------------|------------|------------|
| STERIMOL maximum width of the side chain (Fauchere et al., 1988)                                               | 1.00       | 6.72       |
| Retention coefficient in HPLC, pH 2.1 (Meek, 1980)                                                             | -7.50      | 18.10      |
| Optimized side chain interaction parameter (Oobatake et al., 1985)                                             | -0.78      | 10.68      |
| Surrounding hydrophobicity in alpha-helix (Ponnuswamy et al., 1980)                                            | 10.98      | 15.36      |
| Average relative fractional occurrence in AL(i-1) (Rackovsky-Scheraga, 1982)                                   | 0.00       | 6.49       |
| RF rank (Zimmerman et al., 1968)                                                                               | 2.80       | 18.80      |
| Surface composition of amino acids in extracellular proteins of mesophiles (percent) (Fukuchi-Nishikawa, 2001) | 0.42       | 9.67       |
| Diameter (maximum eccentricity) (Karkbara-Knisley, 2016)                                                       | 0.00       | 14.00      |

**Table S4.** Calculated NDM for BBT data set together with the experimental and predicted biological activities.

|          | Sequence | NDV    |        | Experimental | Predicted |
|----------|----------|--------|--------|--------------|-----------|
| Training | GV       | -1.456 | -1.468 | 1.13         | 1.31      |
| Training | GL       | -1.536 | -1.872 | 1.68         | 1.68      |
| Training | GI       | -1.493 | -1.650 | 1.7          | 1.68      |
| Training | GP       | -1.516 | -1.706 | 1.35         | 1.47      |
| Training | GF       | -1.572 | -2.099 | 1.8          | 2.01      |
| Training | GW       | -1.600 | -2.223 | 1.89         | 1.97      |
| Training | AV       | -1.461 | -1.473 | 1.16         | 1.17      |
| Training | AL       | -1.561 | -1.890 | 1.7          | 1.58      |
| Training | AF       | -1.606 | -2.120 | 1.72         | 1.91      |
| Training | VG       | -1.468 | -1.456 | 1.19         | 1.30      |
| Training | VA       | -1.473 | -1.461 | 1.16         | 1.18      |
| Training | VV       | -1.481 | -1.481 | 1.71         | 1.39      |
| Training | VL       | -1.602 | -1.912 | 2            | 1.86      |
| Training | LG       | -1.872 | -1.536 | 1.72         | 1.72      |
| Training | LA       | -1.890 | -1.561 | 1.72         | 1.65      |
| Training | LL       | -2.085 | -2.085 | 2.35         | 2.42      |
| Training | LF       | -2.164 | -2.330 | 2.75         | 2.81      |
| Training | LY       | -1.951 | -1.704 | 2.46         | 2.38      |
| Training | IG       | -1.650 | -1.493 | 1.68         | 1.73      |
| Training | IA       | -1.663 | -1.508 | 1.68         | 1.67      |
| Training | IV       | -1.681 | -1.540 | 2.05         | 1.93      |
| Training | II       | -1.759 | -1.759 | 2.26         | 2.50      |
| Training | IP       | -1.775 | -1.808 | 2.4          | 2.11      |
| Training | IW       | -1.947 | -2.367 | 3.05         | 2.93      |
| Training | ID       | -1.489 | -1.547 | 1.37         | 1.28      |
| Training | IQ       | -1.444 | -1.725 | 1.49         | 1.57      |
| Training | IE       | -1.436 | -1.782 | 1.37         | 1.36      |
| Training | IK       | -1.351 | -2.187 | 1.65         | 1.65      |
| Training | IS       | -1.555 | -1.439 | 1.49         | 1.46      |
| Training | IT       | -1.513 | -1.455 | 1.49         | 1.82      |
| Training | PA       | -1.718 | -1.531 | 1.32         | 1.34      |
| Training | PL       | -1.882 | -2.013 | 2.22         | 2.05      |
| Training | PI       | -1.808 | -1.775 | 2.33         | 2.07      |
| Training | FG       | -2.099 | -1.572 | 1.77         | 2.10      |
| Training | FL       | -2.330 | -2.164 | 2.87         | 2.85      |
| Training | FP       | -2.249 | -1.948 | 2.7          | 2.51      |
| Training | FF       | -2.415 | -2.415 | 3.1          | 3.27      |
| Training | WW       | -2.586 | -2.586 | 3.6          | 3.50      |
| Training | YL       | -1.704 | -1.951 | 2.4          | 2.38      |
| Training | SL       | -1.424 | -1.756 | 1.49         | 1.39      |
| Test     | GY       | -1.473 | -1.545 | 1.77         | 1.65      |
| Test     | LW       | -2.206 | -2.457 | 3.4          | 2.87      |
| Test     | IL       | -1.837 | -2.000 | 2.26         | 2.46      |
| Test     | IN       | -1.489 | -1.547 | 1.49         | 1.55      |
| Test     | PY       | -1.767 | -1.654 | 1.8          | 2.02      |
| Test     | PF       | -1.948 | -2.249 | 2.8          | 2.44      |
| Test     | FY       | -2.187 | -1.767 | 3.13         | 2.85      |
| Test     | WE       | -1.885 | -1.526 | 1.56         | 1.79      |

**Table S5.** Statistical analysis of the selected QSAR model for BTT data set.

| <b>Regression coefficient</b> | <b>SE</b> | <b><i>t-value</i></b> | <b><i>P-value</i></b>  |
|-------------------------------|-----------|-----------------------|------------------------|
| 1.92                          | 0.024     | 78.60                 | $8.91 \times 10^{-43}$ |
| -0.33                         | 0.031     | -10.74                | $6.26 \times 10^{-13}$ |
| -0.32                         | 0.031     | -10.40                | $1.57 \times 10^{-12}$ |

**Table S6.** QSAR models for HLA data set obtained using different sets of the AA indices.

| Number of used AA indices | $R^2_{training}$ | $R^2_{test}$ | $q^2_{loo}$  | $q^2_{imo}$  | $RSME_{training}$ | $RSME_{test}$ | $R^2_{MP^a}$ |
|---------------------------|------------------|--------------|--------------|--------------|-------------------|---------------|--------------|
| 2                         | 0.504            | 0.478        | 0.415        | 0.416        | 0.690             | 0.679         | 0.034        |
| 3                         | 0.518            | 0.505        | 0.397        | 0.434        | 0.680             | 0.638         | 0.030        |
| 4                         | 0.511            | 0.507        | 0.392        | 0.416        | 0.685             | 0.661         | 0.063        |
| 5                         | 0.517            | 0.533        | 0.377        | 0.435        | 0.681             | 0.627         | 0.020        |
| <b>6</b>                  | <b>0.540</b>     | <b>0.535</b> | <b>0.407</b> | <b>0.461</b> | <b>0.664</b>      | <b>0.623</b>  | <b>0.048</b> |
| 7                         | 0.527            | 0.530        | 0.396        | 0.450        | 0.673             | 0.627         | 0.055        |
| 8                         | 0.541            | 0.535        | 0.406        | 0.456        | 0.663             | 0.625         | 0.058        |
| 9                         | 0.549            | 0.534        | 0.397        | 0.460        | 0.657             | 0.623         | 0.041        |
| 10                        | 0.540            | 0.537        | 0.399        | 0.454        | 0.664             | 0.622         | 0.032        |
| 11                        | 0.540            | 0.535        | 0.395        | 0.456        | 0.664             | 0.629         | 0.037        |
| 12                        | 0.543            | 0.536        | 0.413        | 0.466        | 0.662             | 0.625         | 0.061        |
| 13                        | 0.514            | 0.521        | 0.373        | 0.413        | 0.683             | 0.652         | 0.054        |
| 14                        | 0.524            | 0.534        | 0.386        | 0.423        | 0.676             | 0.645         | 0.059        |
| 15                        | 0.537            | 0.531        | 0.427        | 0.453        | 0.666             | 0.647         | 0.026        |
| 16                        | 0.522            | 0.519        | 0.390        | 0.426        | 0.677             | 0.651         | 0.030        |
| 17                        | 0.521            | 0.522        | 0.387        | 0.422        | 0.678             | 0.654         | 0.029        |
| 18                        | 0.522            | 0.520        | 0.387        | 0.423        | 0.677             | 0.654         | 0.057        |
| 19                        | 0.533            | 0.511        | 0.411        | 0.445        | 0.669             | 0.659         | 0.045        |
| 20                        | 0.490            | 0.517        | 0.331        | 0.361        | 0.699             | 0.642         | 0.047        |
